# Supplementary material for: Identification of a Candidate Gene Responsible for the G Locus Determining Chartreuse Bulb Color in Onion (Allium Cepa L.) Using Bulked Segregant RNA-Seq
Source: Research Square preprint supplement (doi:10.21203/rs.3.rs-973021/v1), 2021-10-20
Supplement: Supplementary file 1 [file b3798f880ddc79ac3bada103.xlsx]

## Sheet: Supplementary Table 5
Supplementary Table 5. List of contigs containing SNPs or InDels between chartreuse and yellow bulked RNAs
Contig	Length of contigs (bp)	Number of SNPs or InDels	Annotation
CL136.Contig9_DHA_Bulb	766	14	hypothetical protein
CL182.Contig1_DHA_Bulb	210	3	Putative transposable element
CL280.Contig4_DHA_Bulb	265	1	Serine carboxypeptidase-like 45
CL835.Contig2_DHA_Bulb	1934	1	laccase-3
CL1111.Contig2_DHA_Bulb	1235	9	flavonoid glucosyl-transferase
CL1397.Contig5_DHA_Bulb	849	1	glutamine synthetase cytosolic isozyme
CL1923.Contig2_DHA_Bulb	696	3	mitogen-activated protein kinase kinase 1-like
CL2097.Contig4_DHA_Bulb	306	2	No hit
CL2100.Contig3_DHA_Bulb	172	2	ATP-citrate synthase beta chain protein 1
CL2126.Contig3_DHA_Bulb	264	2	laccase-11-like
CL2204.Contig1_DHA_Bulb	469	2	No hit
CL2300.Contig1_DHA_Bulb	306	2	Inositol hexakisphosphate and diphosphoinositol-pentakisphosphate kinase 2
CL2551.Contig2_DHA_Bulb	310	1	No hit
CL2808.Contig1_DHA_Bulb	150	1	No hit
CL2867.Contig3_DHA_Bulb	271	1	No hit
CL3467.Contig2_DHA_Bulb	965	3	hypothetical protein
CL3499.Contig2_DHA_Bulb	904	1	transcription factor GTE1
CL3859.Contig1_DHA_Bulb	737	4	receptor-like kinase TMK3
CL3911.Contig1_DHA_Bulb	232	2	UBP1-associated protein 2C
CL3952.Contig2_DHA_Bulb	234	5	uncharacterized protein
CL4923.Contig1_DHA_Bulb	822	1	No hit
CL5035.Contig2_DHA_Bulb	626	1	PLAT domain-containing protein 3-like
CL5603.Contig1_DHA_Bulb	153	1	No hit
CL5694.Contig2_DHA_Bulb	4413	1	cinnamoyl-CoA reductase 1
CL5810.Contig2_DHA_Bulb	255	1	No hit
Unigene240_DHA_Bulb	1826	2	protein XAP5 CIRCADIAN TIMEKEEPER
Unigene650_DHA_Bulb	235	1	No hit
Unigene1151_DHA_Bulb	162	1	No hit
Unigene1518_DHA_Bulb	205	2	No hit
Unigene2317_DHA_Bulb	219	2	No hit
Unigene2527_DHA_Bulb	160	2	No hit
Unigene2584_DHA_Bulb	194	4	No hit
Unigene2613_DHA_Bulb	164	1	No hit
Unigene2655_DHA_Bulb	157	3	No hit
Unigene2768_DHA_Bulb	165	8	No hit
Unigene2794_DHA_Bulb	152	4	No hit
Unigene3281_DHA_Bulb	277	5	probable serine/threonine-protein kinase PBL1
Unigene3459_DHA_Bulb	189	2	No hit
Unigene4094_DHA_Bulb	512	1	No hit
Unigene4328_DHA_Bulb	222	2	No hit
Unigene4456_DHA_Bulb	285	3	No hit
Unigene4708_DHA_Bulb	304	1	uncharacterized protein
Unigene5257_DHA_Bulb	378	1	No hit
Unigene6125_DHA_Bulb	213	2	No hit
Unigene6646_DHA_Bulb	201	1	No hit
Unigene7117_DHA_Bulb	480	1	ABC transporter B family member 20-like
Unigene7896_DHA_Bulb	189	1	No hit
Unigene7910_DHA_Bulb	702	1	No hit
Unigene8768_DHA_Bulb	200	1	No hit
Unigene8805_DHA_Bulb		5	No hit
Unigene9261_DHA_Bulb	191	1	No hit
Unigene9491_DHA_Bulb	152	3	No hit
Unigene9639_DHA_Bulb	177	3	No hit
Unigene9973_DHA_Bulb	225	1	No hit
Unigene10004_DHA_Bulb	262	6	No hit
Unigene10398_DHA_Bulb	229	2	No hit
Unigene11032_DHA_Bulb	199	1	manganese-dependent ADP-ribose/CDP-alcohol diphosphatase
Unigene12186_DHA_Bulb	864	2	translocase of chloroplast 159
Unigene12360_DHA_Bulb	560	3	selT-like protein
Unigene12368_DHA_Bulb	702	4	RING-H2 finger protein ATL66-like
Unigene12494_DHA_Bulb	151	1	pentatricopeptide repeat-containing protein At5g15980
Unigene14386_DHA_Bulb	177	1	No hit
Unigene14576_DHA_Bulb	162	1	Putative transposable element
Unigene14671_DHA_Bulb	165	2	No hit
Unigene14795_DHA_Bulb	277	2	No hit
Unigene14939_DHA_Bulb	157	9	MDIS1-interacting receptor like kinase 2-like
Unigene15213_DHA_Bulb	150	1	mannan endo-14-beta-mannosidase-like
Unigene15877_DHA_Bulb	1165	2	E3 ubiquitin-protein ligase UPL4
Unigene16451_DHA_Bulb	586	18	No hit
Unigene16649_DHA_Bulb	357	3	xyloglucan endotransglucosylase/hydrolase 2
Unigene16662_DHA_Bulb	792	13	uncharacterized protein
Unigene17055_DHA_Bulb	269	15	No hit
Unigene17269_DHA_Bulb	234	1	No hit
Unigene18313_DHA_Bulb	395	3	uncharacterized protein
Unigene18702_DHA_Bulb	234	1	E3 ubiquitin-protein ligase UPL4
Unigene18782_DHA_Bulb	160	1	transcription termination factor MTERF2
Unigene18960_DHA_Bulb	347	3	NADH dehydrogenase subunit F
Unigene18985_DHA_Bulb	326	1	pentatricopeptide repeat-containing protein At5g16640
Unigene19017_DHA_Bulb	437	1	uncharacterized protein
Unigene19084_DHA_Bulb	225	6	B3 domain-containing protein
Unigene19164_DHA_Bulb	258	2	No hit
Unigene19842_DHA_Bulb	181	3	No hit
Unigene20068_DHA_Bulb	212	4	xanthoxin dehydrogenase
Unigene20069_DHA_Bulb	508	4	secoisolariciresinol dehydrogenase-like
Unigene20247_DHA_Bulb	407	1	No hit
Unigene21863_DHA_Bulb	270	4	No hit
Unigene22117_DHA_Bulb	293	2	No hit
Unigene22255_DHA_Bulb	246	4	No hit
Unigene23277_DHA_Bulb	328	2	oxysterol-binding protein-related protein
Unigene24073_DHA_Bulb	154	3	gamma-tubulin complex component 3
Unigene24112_DHA_Bulb	150	4	No hit
Unigene25044_DHA_Bulb	2746	1	CBL-interacting protein kinase 18-like
Unigene25934_DHA_Bulb	276	1	protein RST1
Unigene26412_DHA_Bulb	157	1	No hit
Unigene26451_DHA_Bulb	359	9	No hit
Unigene26458_DHA_Bulb	482	5	TBC1 domain family member 8B-like
Unigene26752_DHA_Bulb	150	2	No hit
Unigene26767_DHA_Bulb	772	1	S-adenosylmethionine carrier 1
Unigene26950_DHA_Bulb	188	4	guanine nucleotide exchange factor SPIKE 1-like
Unigene27884_DHA_Bulb	2076	7	Non-specific lipid-transfer protein
Unigene27942_DHA_Bulb	879	3	U-box domain-containing protein 16
Unigene28120_DHA_Bulb	485	1	60S ribosomal protein L29-1-like
Unigene28157_DHA_Bulb	960	6	protein LURP-one-related 10-like
Unigene29034_DHA_Bulb	500	4	probable serine/threonine-protein kinase PBL1
Unigene30237_DHA_Bulb	1024	2	uncharacterized protein
Unigene30568_DHA_Bulb	1068	8	hypothetical protein
Unigene30730_DHA_Bulb	652	1	remorin 4.1-like
Unigene31057_DHA_Bulb	298	3	GDSL esterase/lipase At5g62930
Unigene31885_DHA_Bulb	303	2	cell cycle checkpoint control protein RAD9A
Unigene32400_DHA_Bulb	376	4	pentatricopeptide repeat-containing protein At5g16420
Unigene32503_DHA_Bulb	634	6	No hit
Unigene32513_DHA_Bulb	644	3	Putative transposable element
Unigene32871_DHA_Bulb	219	2	No hit
Unigene32935_DHA_Bulb	340	5	No hit
Unigene33152_DHA_Bulb	202	3	No hit
Unigene33345_DHA_Bulb	256	4	No hit
Unigene33585_DHA_Bulb	321	1	No hit
Unigene33600_DHA_Bulb	412	1	No hit
Unigene33678_DHA_Bulb	159	7	No hit
Unigene33679_DHA_Bulb	268	3	No hit
Unigene34396_DHA_Bulb	277	6	No hit
Unigene34423_DHA_Bulb	336	1	No hit
Unigene34639_DHA_Bulb	234	1	No hit
Unigene35216_DHA_Bulb	218	13	No hit
Unigene35474_DHA_Bulb	274	1	No hit
Unigene35482_DHA_Bulb	169	2	No hit
Unigene35658_DHA_Bulb	197	5	No hit
Unigene35885_DHA_Bulb	292	4	No hit
Unigene35931_DHA_Bulb	307	4	No hit
Unigene35962_DHA_Bulb	263	5	No hit
Unigene36063_DHA_Bulb	219	1	No hit
Unigene36188_DHA_Bulb	291	3	No hit
Unigene36274_DHA_Bulb	206	1	No hit
Unigene36402_DHA_Bulb	236	1	No hit
Unigene36497_DHA_Bulb	281	2	No hit
Unigene36550_DHA_Bulb	284	1	pentatricopeptide repeat-containing protein At3g57430
Unigene36799_DHA_Bulb	241	4	hypothetical protein
Unigene36953_DHA_Bulb	289	1	heavy metal-associated isoprenylated plant protein 41-like
Unigene37007_DHA_Bulb	179	3	No hit
Unigene37033_DHA_Bulb	278	3	No hit
Unigene37206_DHA_Bulb	178	2	No hit
Unigene37701_DHA_Bulb	165	3	No hit
Unigene37883_DHA_Bulb	279	1	No hit
Unigene37957_DHA_Bulb	236	2	No hit
Unigene38082_DHA_Bulb	270	1	uncharacterized protein
Unigene38377_DHA_Bulb	201	5	No hit
Unigene38443_DHA_Bulb	162	1	No hit
Unigene38491_DHA_Bulb	201	2	No hit
Unigene38753_DHA_Bulb	180	1	No hit
Unigene39110_DHA_Bulb	169	5	No hit
Unigene39335_DHA_Bulb	171	12	uncharacterized protein
Unigene39487_DHA_Bulb	174	1	No hit
Unigene39637_DHA_Bulb	176	3	No hit
Unigene39640_DHA_Bulb	150	1	thyroid adenoma-associated protein homolog
Unigene39692_DHA_Bulb	183	1	No hit
Unigene39917_DHA_Bulb	153	1	No hit
Unigene40305_DHA_Bulb	231	2	No hit
Unigene40308_DHA_Bulb	179	6	No hit
Unigene40394_DHA_Bulb	225	1	No hit
Unigene40410_DHA_Bulb	166	7	No hit
Unigene40642_DHA_Bulb	165	1	No hit
Unigene40930_DHA_Bulb	155	1	No hit
Unigene40971_DHA_Bulb	198	2	No hit
