# Supplementary material for: Identification of a Candidate Gene Responsible for the G Locus Determining Chartreuse Bulb Color in Onion (Allium Cepa L.) Using Bulked Segregant RNA-Seq
Source: Research Square preprint supplement (doi:10.21203/rs.3.rs-973021/v1), 2021-10-20
Supplement: Supplementary file 2 [file b6d9d6dd35b91dd8b69a79fa.xlsx]

## Sheet: Supplementary Table 6
Supplementary Table 6. List of contigs showing more than three-fold decreased transcription in the chartreuse bulked RNAs and at least 3 FPKM values in the yellow bulk.
Contig	Length (bp)	FPKM value		Fold change (Yellow/Chartreuse)	Annotation
		Chartreuse	Yellow
CL445.Contig2_DHA_Bulb	153	0.669275	3.70972	5.5429	hypothetical protein
CL835.Contig2_DHA_Bulb	1934	37.9275	268.396	7.07655	laccase-3
CL892.Contig1_DHA_Bulb	403	3.2185	9.76495	3.03401	cytokinin dehydrogenase
CL907.Contig2_DHA_Bulb	252	0.541794	3.60373	6.65148	hypothetical protein
CL1452.Contig2_DHA_Bulb	150	116.507	361.995	3.10706	hypothetical protein
CL1883.Contig1_DHA_Bulb	259	0.922514	3.06804	3.32574	hypothetical protein
CL2210.Contig1_DHA_Bulb	150	1.13777	4.79296	4.21261	No hit
CL2684.Contig1_DHA_Bulb	845	116.416	381.795	3.27958	CHI-ACAD
CL2684.Contig2_DHA_Bulb	839	97.8425	328.15	3.35386	CHI-ACAD
CL2734.Contig1_DHA_Bulb	1634	161.787	633.586	3.91617	furostanol glycoside 26-O-beta-glucosidase-like
CL2814.Contig2_DHA_Bulb	234	1.02107	3.07241	3.009	Adenylate kinase/UMP-CMP kinase
CL2867.Contig2_DHA_Bulb	317	1.07675	3.93909	3.65832	No hit
CL3277.Contig5_DHA_Bulb	159	0.858692	3.80772	4.43432	F-box protein
CL4220.Contig1_DHA_Bulb	320	1.38665	7.56784	5.45763	Putative pectate lyase
CL4220.Contig4_DHA_Bulb	251	1.49587	8.1407	5.44212	Putative pectate lyase
CL5138.Contig2_DHA_Bulb	201	1.18871	4.70637	3.95922	No hit
CL5599.Contig2_DHA_Bulb	321	1.276	5.42244	4.24956	Transposable element
CL6497.Contig1_DHA_Bulb	925	4.42807	13.8266	3.1225	bHLH transcription factor (B2)
CL6704.Contig1_DHA_Bulb	1639	84.4266	322.245	3.81686	alliinase precursor
CL6813.Contig2_DHA_Bulb	207	0.494681	3.10757	6.28196	No hit
CL6883.Contig1_DHA_Bulb	453	3.16465	11.8613	3.74806	peamaclein
CL6883.Contig2_DHA_Bulb	359	1.04586	3.58366	3.42652	peamaclein
Unigene1091_DHA_Bulb	153	0.446183	3.70972	8.31435	cytochrome P450 78A5-like
Unigene1193_DHA_Bulb	166	1.43934	7.75019	5.38453	UDP-glycosyltransferase
Unigene1278_DHA_Bulb	240	1.13777	5.04522	4.43432	hypothetical protein
Unigene1530_DHA_Bulb	167	0.204389	3.17215	15.5201	myricetin 3-O-rhamnoside 1,2-glucosyltransferase
Unigene1616_DHA_Bulb	189	0.180598	3.20332	17.7373	No hit
Unigene1877_DHA_Bulb	150	0.68266	4.03618	5.91243	glycosyltransferase
Unigene1949_DHA_Bulb	161	1.27204	3.99544	3.14098	No hit
Unigene1959_DHA_Bulb	188	0.544676	3.22036	5.91243	pyruvate:ferredoxin (flavodoxin) oxidoreductase
Unigene1989_DHA_Bulb	158	0.648095	4.0713	6.28196	No hit
Unigene2052_DHA_Bulb	151	25.0911	81.1914	3.23586	hypothetical protein
Unigene2057_DHA_Bulb	154	1.5515	5.4056	3.48411	No hit
Unigene2453_DHA_Bulb	169	1.21182	3.80631	3.14098	hypothetical protein
Unigene2542_DHA_Bulb	189	0.722392	3.00311	4.15718	No hit
Unigene2987_DHA_Bulb	183	1.30563	5.16929	3.95922	glycosyltransferase
Unigene3537_DHA_Bulb	169	1.21182	3.80631	3.14098	UDP-glucuronate 4-epimerase 6
Unigene3785_DHA_Bulb	249	1.09664	4.7109	4.29575	No hit
Unigene3806_DHA_Bulb	472	3.03726	10.1813	3.35214	Pectate lyase
Unigene4051_DHA_Bulb	170	2.40939	9.12592	3.78765	No hit
Unigene4123_DHA_Bulb	250	2.32104	7.26512	3.13011	hypothetical protein
Unigene5008_DHA_Bulb	295	1.04135	3.59152	3.44892	No hit
Unigene5277_DHA_Bulb	285	1.31741	3.98307	3.0234	No hit
Unigene5748_DHA_Bulb	193	1.23798	4.70539	3.80085	No hit
Unigene6673_DHA_Bulb	266	1.79647	6.68587	3.72166	cytokinin dehydrogenase
Unigene7138_DHA_Bulb	325	3.36079	10.9443	3.25646	GDSL esterase/lipase
Unigene7688_DHA_Bulb	505	0.405541	3.89631	9.6077	No hit
Unigene8009_DHA_Bulb	236	211.306	693.932	3.28401	No hit
Unigene8259_DHA_Bulb	150	4.77862	15.6402	3.27295	tetraspanin
Unigene9190_DHA_Bulb	300	2.73064	10.8472	3.97241	cytokinin dehydrogenase
Unigene10110_DHA_Bulb	407	1.09024	5.57826	5.11653	No hit
Unigene10230_DHA_Bulb	805	28.7056	838.62	29.2145	ribosomal protein S1
Unigene10549_DHA_Bulb	154	5.09779	16.7082	3.27754	cytokinin dehydrogenase
Unigene11249_DHA_Bulb	257	0.531253	3.38639	6.37434	hypothetical protein
Unigene11877_DHA_Bulb	169	3.63547	12.3145	3.38733	No hit
Unigene13031_DHA_Bulb	179	0.953436	3.38227	3.54746	hypothetical protein
Unigene13546_DHA_Bulb	181	1.8858	6.06263	3.21488	No hit
Unigene13763_DHA_Bulb	354	4.72462	14.2164	3.009	probable pectate lyase
Unigene14199_DHA_Bulb	241	1.27468	4.08224	3.20257	hypothetical protein
Unigene14900_DHA_Bulb	173	4.14331	14.217	3.43132	No hit
Unigene14922_DHA_Bulb	158	1.08016	4.55028	4.21261	transcription factor DIVARICATA-like
Unigene15152_DHA_Bulb	234	12.5446	38.486	3.06793	triacylglycerol lipase
Unigene15520_DHA_Bulb	157	1.08704	3.85622	3.54746	WEB family protein
Unigene15568_DHA_Bulb	159	1.71738	5.71157	3.32574	No hit
Unigene15761_DHA_Bulb	377	14.0335	45.668	3.25422	acyltransferase 1
Unigene16146_DHA_Bulb	158	1.29619	4.78977	3.69527	cysteine-tryptophan domain-containing zinc finger protein
Unigene16377_DHA_Bulb	205	0.999015	3.69163	3.69527	PHOTOPERIOD-INDEPENDENT EARLY FLOWERING
Unigene16650_DHA_Bulb	353	0.773552	4.18053	5.40433	xyloglucan endotransglucosylase/hydrolase 2
Unigene16787_DHA_Bulb	227	0.902194	3.66723	4.0648	No hit
Unigene17002_DHA_Bulb	166	13.9822	51.7439	3.7007	7-deoxyloganetic acid glucosyltransferase-like
Unigene17233_DHA_Bulb	334	70.2077	214.12	3.04981	probable peroxygenase
Unigene17384_DHA_Bulb	222	0.615009	3.23849	5.26576	aldehyde dehydrogenase
Unigene17656_DHA_Bulb	153	1.11546	4.69898	4.21261	Chaperone protein dnaJ 49
Unigene17678_DHA_Bulb	161	2.54407	7.99088	3.14098	cytochrome P450 734A6-like
Unigene18590_DHA_Bulb	161	6.7842	27.7331	4.08789	E3 ubiquitin-protein ligase
Unigene19262_DHA_Bulb	240	0.995546	2.9956	3.009	No hit
Unigene19501_DHA_Bulb	226	1.66134	5.19033	3.12418	No hit
Unigene19536_DHA_Bulb	174	0.980833	3.47947	3.54746	AP-5 complex subunit beta-1
Unigene20572_DHA_Bulb	170	0.01	27.6003	2760.03	DNA polymerase epsilon catalytic subunit A
Unigene21728_DHA_Bulb	1190	4.4459	13.6094	3.06111	Caffeoylshikimate esterase
Unigene22050_DHA_Bulb	157	1.08704	4.82028	4.43432	No hit
Unigene22233_DHA_Bulb	1152	11.8221	35.737	3.0229	probable serine/threonine-protein kinase WNK11
Unigene22294_DHA_Bulb	296	0.922514	3.96289	4.29575	No hit
Unigene23104_DHA_Bulb	161	0.848025	3.76042	4.43432	beta-glucosidase 18
Unigene23753_DHA_Bulb	290	20.1267	67.8496	3.37112	protein G1-like7
Unigene24339_DHA_Bulb	1628	0.880581	3.76532	4.27595	endoglucanase 23
Unigene25432_DHA_Bulb	151	1.58232	6.51536	4.11759	No hit
Unigene25702_DHA_Bulb	178	0.958792	4.88933	5.09947	No hit
Unigene26445_DHA_Bulb	269	1.01511	3.51665	3.46431	No hit
Unigene26781_DHA_Bulb	164	0.208128	2.99945	14.4115	protein wntless
Unigene26989_DHA_Bulb	247	0.967332	3.0639	3.16737	No hit
Unigene29048_DHA_Bulb	502	4.21563	26.3065	6.24024	No hit
Unigene29291_DHA_Bulb	232	2.05975	7.3395	3.56329	No hit
Unigene29543_DHA_Bulb	388	1.2316	4.09599	3.32574	hypothetical protein
Unigene29550_DHA_Bulb	326	1.67524	5.10713	3.0486	No hit
Unigene29769_DHA_Bulb	552	0.12367	797.913	6451.94	No hit
Unigene30375_DHA_Bulb	250	3.8229	31.1795	8.15599	protein CASPARIAN STRIP INTEGRITY FACTOR 1-like
Unigene30701_DHA_Bulb	253	7.95987	35.4462	4.45311	No hit
Unigene32119_DHA_Bulb	233	0.878961	3.5728	4.0648	sulfite exporter TauE/SafE family protein
Unigene32296_DHA_Bulb	315	1.19195	3.72386	3.12418	putative E3 ubiquitin-protein ligase
Unigene32666_DHA_Bulb	307	0.667094	3.32788	4.98861	No hit
Unigene32727_DHA_Bulb	156	0.437603	3.88094	8.86864	No hit
Unigene32841_DHA_Bulb	617	4.48099	15.7612	3.51735	bHLH transcription factor [Allium cepa]
Unigene32931_DHA_Bulb	368	3.80286	14.3953	3.7854	WRKY transcription factor [Allium cepa]
Unigene33610_DHA_Bulb	279	2.81383	1693.41	601.815	protein SAWADEE HOMEODOMAIN HOMOLOG 2
Unigene33794_DHA_Bulb	283	19.4184	105.629	5.43962	endoglucanase 3-like
Unigene33847_DHA_Bulb	153	0.669275	3.70972	5.5429	No hit
Unigene33937_DHA_Bulb	210	27.9566	89.7329	3.20973	putative alpha-expansin
Unigene34153_DHA_Bulb	298	0.801782	4.57118	5.70127	No hit
Unigene34401_DHA_Bulb	303	2.9289	9.11637	3.11255	probable transcription factor KAN2
Unigene34528_DHA_Bulb	254	3.09078	9.9812	3.22934	No hit
Unigene34870_DHA_Bulb	331	1.13433	5.60157	4.93822	No hit
Unigene35152_DHA_Bulb	161	1.69605	5.17057	3.0486	No hit
Unigene35633_DHA_Bulb	180	1.13777	3.5737	3.14098	No hit
Unigene35839_DHA_Bulb	248	19.5439	85.7485	4.38748	Endoglucanase 9
Unigene35885_DHA_Bulb	292	1.51962	4.79469	3.15519	No hit
Unigene35920_DHA_Bulb	214	0.4785	3.00592	6.28196	transcription factor ABORTED MICROSPORES
Unigene36450_DHA_Bulb	222	1.07627	3.74983	3.48411	No hit
Unigene37210_DHA_Bulb	285	1.07788	3.31923	3.07939	hypothetical protein
Unigene37239_DHA_Bulb	262	2.34502	7.65449	3.26415	No hit
Unigene37359_DHA_Bulb	227	0.451097	3.83393	8.49912	WEB family protein
Unigene37487_DHA_Bulb	150	1.36532	5.29749	3.88003	cell division cycle protein 27 homolog B
Unigene37810_DHA_Bulb	354	966.523	3070.32	3.17666	senescence-specific cysteine protease SAG39-like
Unigene38204_DHA_Bulb	186	1.28458	5.49278	4.27595	No hit
Unigene38251_DHA_Bulb	154	0.664929	3.43993	5.17338	No hit
Unigene38802_DHA_Bulb	158	1.29619	5.98721	4.61909	No hit
Unigene38818_DHA_Bulb	305	1.9025	6.07908	3.19532	No hit
Unigene38845_DHA_Bulb	192	0.88888	3.54742	3.99089	No hit
Unigene38859_DHA_Bulb	201	0.679264	3.20033	4.71147	No hit
Unigene38889_DHA_Bulb	188	1.27091	3.82417	3.009	No hit
Unigene38913_DHA_Bulb	235	6.8266	25.9239	3.79748	indole-3-acetic acid-amido synthetase
Unigene39335_DHA_Bulb	171	2.19569	9.29383	4.23276	hypothetical protein
Unigene39411_DHA_Bulb	179	0.572061	3.38227	5.91243	No hit
Unigene39527_DHA_Bulb	188	0.544676	3.82417	7.02101	pentatricopeptide repeat-containing protein At3g06920
Unigene40064_DHA_Bulb	151	0.904185	3.00709	3.32574	No hit
Unigene40177_DHA_Bulb	163	2.30345	7.42855	3.22496	No hit
Unigene40264_DHA_Bulb	155	0.880852	3.17361	3.60289	No hit
Unigene40296_DHA_Bulb	189	1.26419	5.00518	3.95922	No hit
Unigene40442_DHA_Bulb	156	0.875205	3.15327	3.60289	No hit
Unigene40805_DHA_Bulb	168	0.406345	4.0542	9.97723	No hit
Unigene40839_DHA_Bulb	193	182.868	683.262	3.73637	No hit
Unigene40877_DHA_Bulb	222	0.768761	3.23849	4.21261	No hit
Unigene41007_DHA_Bulb	154	1.32986	4.42276	3.32574	No hit
