# Supplementary material for: Identification of a Candidate Gene Responsible for the G Locus Determining Chartreuse Bulb Color in Onion (Allium Cepa L.) Using Bulked Segregant RNA-Seq
Source: Research Square preprint supplement (doi:10.21203/rs.3.rs-973021/v1), 2021-10-20
Supplement: Supplementary file 3 [file fad8cbe0e4a1208f5bf939e7.xlsx]

## Sheet: Supplementary Table 1
Supplementary Table 1. Genotypess of the AcLAC12 and DFR-A genes in diverse chartreuse breeding lines.
Breeding line	Institutea	Gonotype of AcLAC12	Genotype of DFR-A
A12 X A25 (Yellow)	CNU	AcLAC12DEL / AcLAC12DEL	DFR-A2AT / DFR-A2AT
A12 X A25 (chartreuse)	CNU	AcLAC12DEL / AcLAC12DEL	DFR-A2AT / DFR-A2AT
JN525	JNST	AcLAC12DEL / AcLAC12DEL	DFR-ATTA / DFR-ATTA
JN526	JNST	AcLAC12DEL / AcLAC12DEL	DFR-ATTA / DFR-ATTA
JN527	JNST	AcLAC12DEL / AcLAC12DEL	DFR-ATTA / DFR-ATTA
JN528	JNST	AcLAC12DEL / AcLAC12DEL	DFR-ATTA / DFR-ATTA
JN529	JNST	AcLAC12DEL / AcLAC12DEL	DFR-ATTA / DFR-ATTA
JN530	JNST	AcLAC12DEL / AcLAC12DEL	DFR-ATTA / DFR-ATTA
JN531	JNST	AcLAC12DEL / AcLAC12DEL	DFR-ATTA / DFR-ATTA
JN532	JNST	AcLAC12DEL / AcLAC12DEL	DFR-ATTA / DFR-ATTA
SG21	NIHHS	AcLAC12LTR / AcLAC12LTR	DFR-ALTR / DFR-ALTR
200046	NIHHS	AcLAC12LTR / AcLAC12LTR	DFR-APS2 / DFR-APS2
200048	NIHHS	AcLAC12LTR / AcLAC12LTR	DFR-APS2 / DFR-APS2
200104	NIHHS	AcLAC12LTR / AcLAC12LTR	DFR-APS2 / DFR-APS2
200106	NIHHS	AcLAC12LTR / AcLAC12LTR	DFR-APS2 / DFR-APS2
200110	NIHHS	AcLAC12LTR / AcLAC12LTR	DFR-APS2 / DFR-APS2
200112	NIHHS	AcLAC12LTR / AcLAC12LTR	DFR-APS2 / DFR-APS2
200114	NIHHS	AcLAC12LTR / AcLAC12LTR	DFR-APS2 / DFR-APS2
200118	NIHHS	AcLAC12LTR / AcLAC12LTR	DFR-APS2 / DFR-APS2
aCNU: Chonnam National University, JNST: Jennong S&T, NIHHS: National Institute of Horticultural and Herbal Science
